# Supplementary material
Source: publisher figshare collection journal article supplement (https://acs.figshare.com/ndownloader/files/3925741)
Supplement: Supplementary file 1 [file 3925741]

# An Intermolecular Potential for Binding of Protonated Peptides Ions with Perfluorinated Hydrocarbon Surfaces

*Subha Pratihar,<sup>a</sup> Swapnil C. Kohale,<sup>a</sup> Saulo A. Vázquez,<sup>b\*</sup> William L. Hase,<sup>a,\*</sup>*

<sup>a</sup>Department of Chemistry and Biochemistry, Texas Tech University, Lubbock, Texas  
79409-1061, USA.

<sup>b</sup>Departamento de Química Física and Centro Singular de Investigación en Química  
Biológica y Materiales Moleculares, Campus Vida, Universidad de Santiago de  
Compostela, 15782 Santiago de Compostela, Spain.

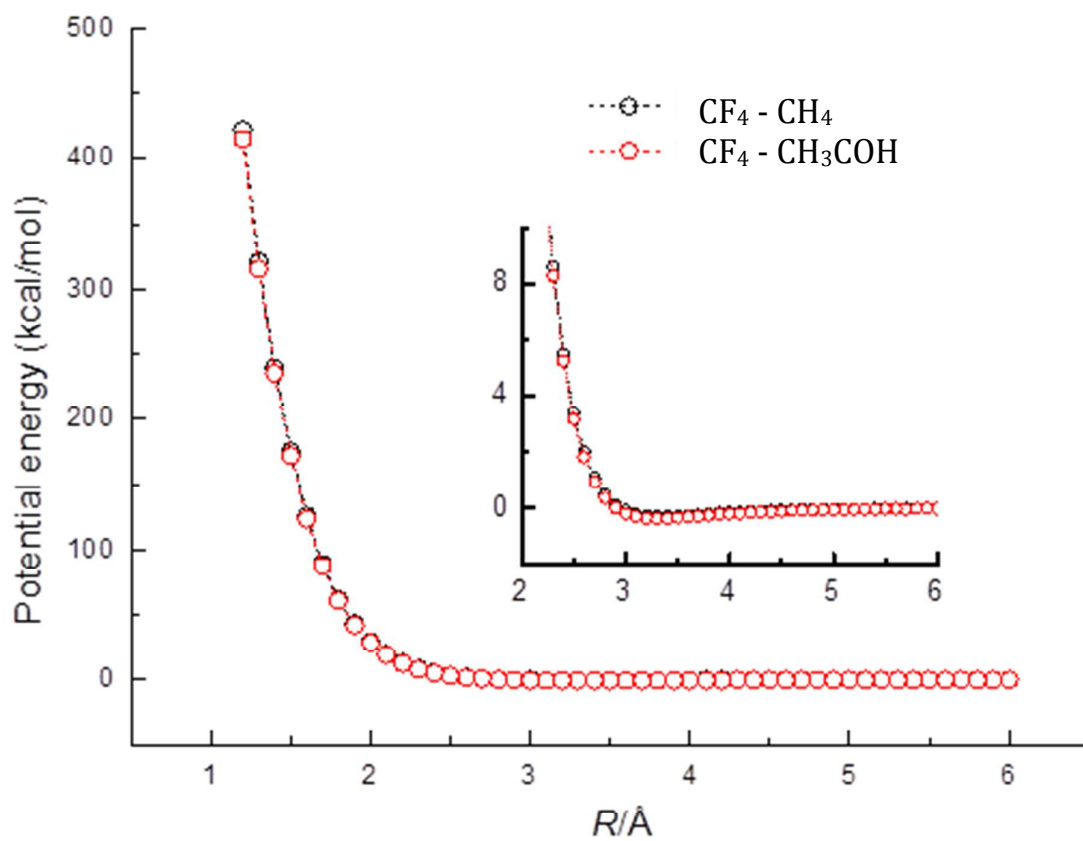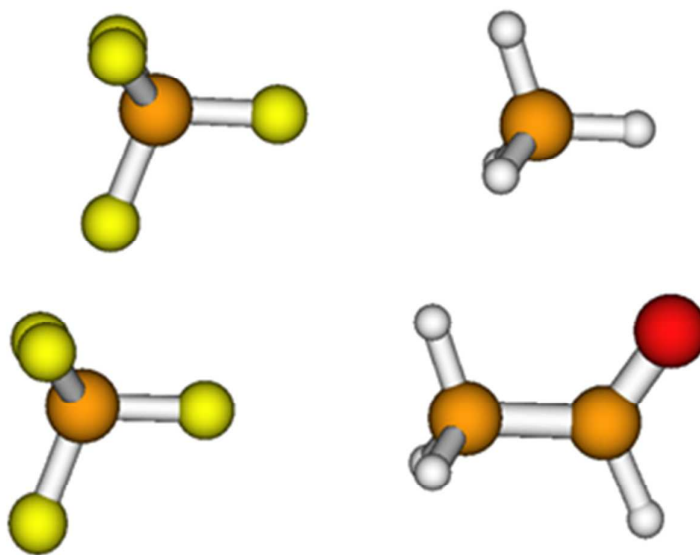

Figure S1: Comparison of MP2/aug-cc-pVTZ potential energy curves for a F-atom of  $\text{CF}_4$  interacting with a C-atom of  $\text{CH}_4$  and  $\text{CH}_3\text{CHO}$ .

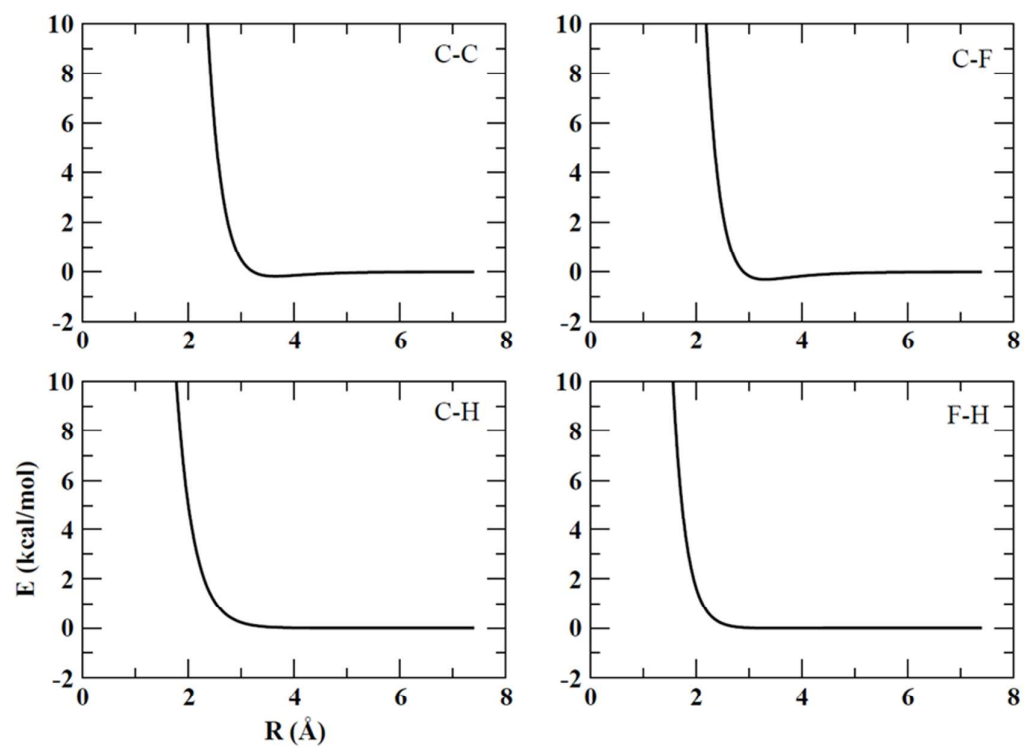

Figure S2. Two-body potentials obtained from the  $\text{CH}_4/\text{CF}_4$  fitting.

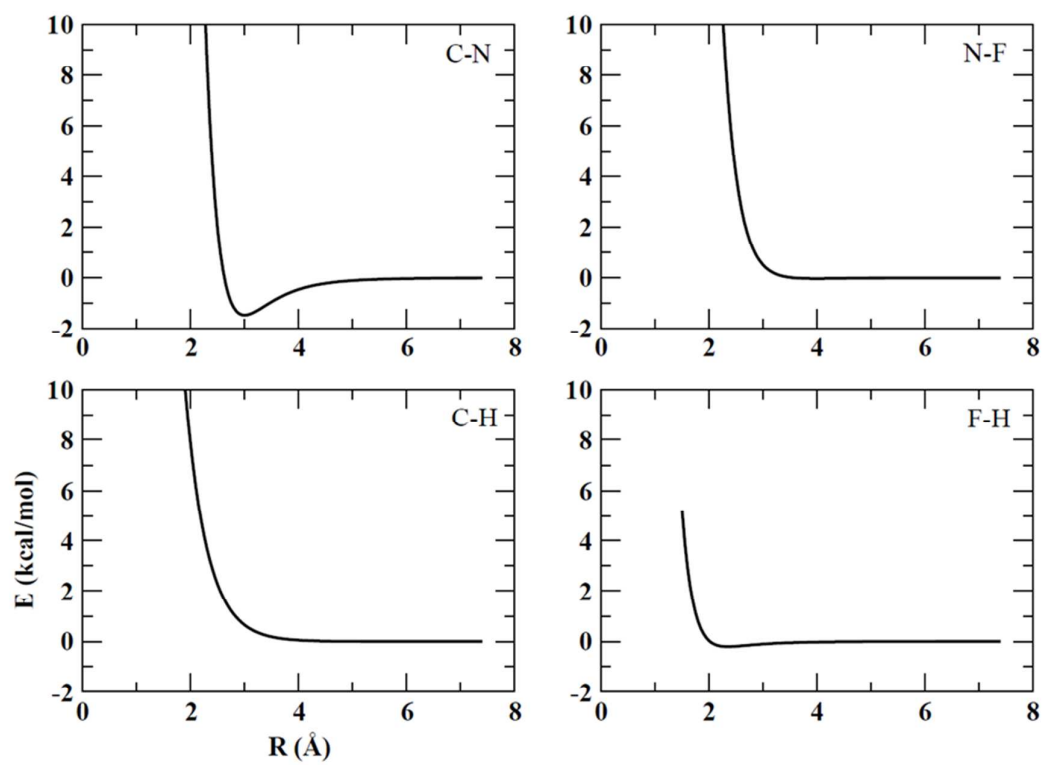

Figure S3. Two-body potentials obtained from the  $\text{NH}_3/\text{CF}_4$  fitting.

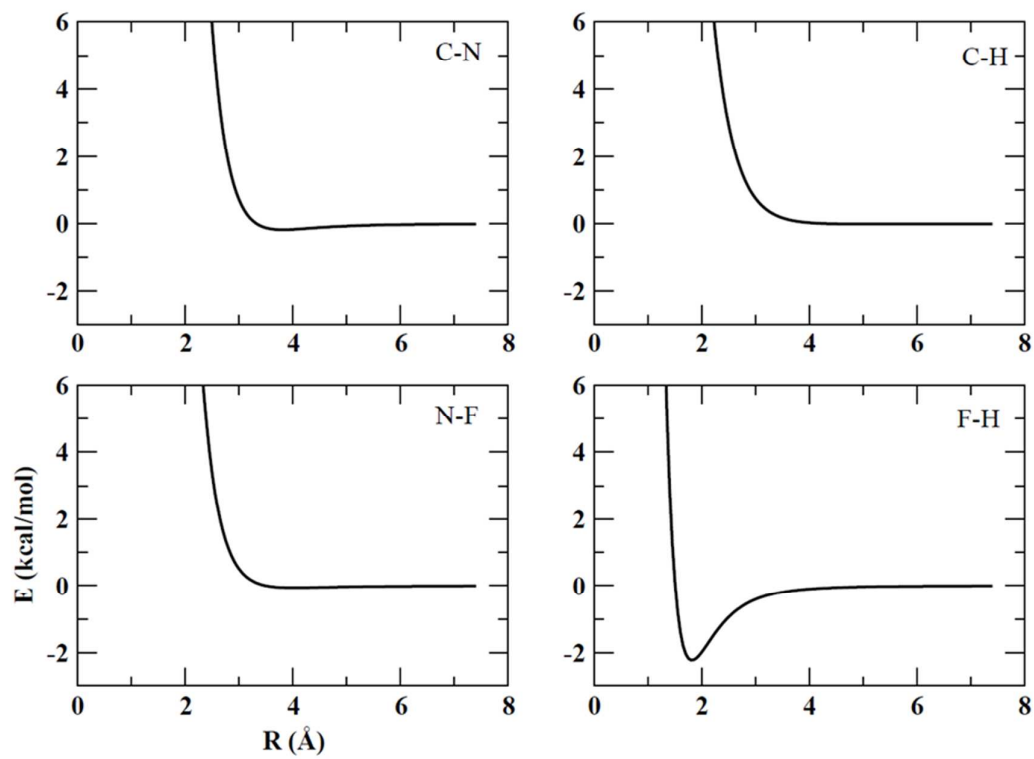

Figure S4. Two-body potentials obtained from the  $\text{NH}_4^+/\text{CF}_4$  fitting.

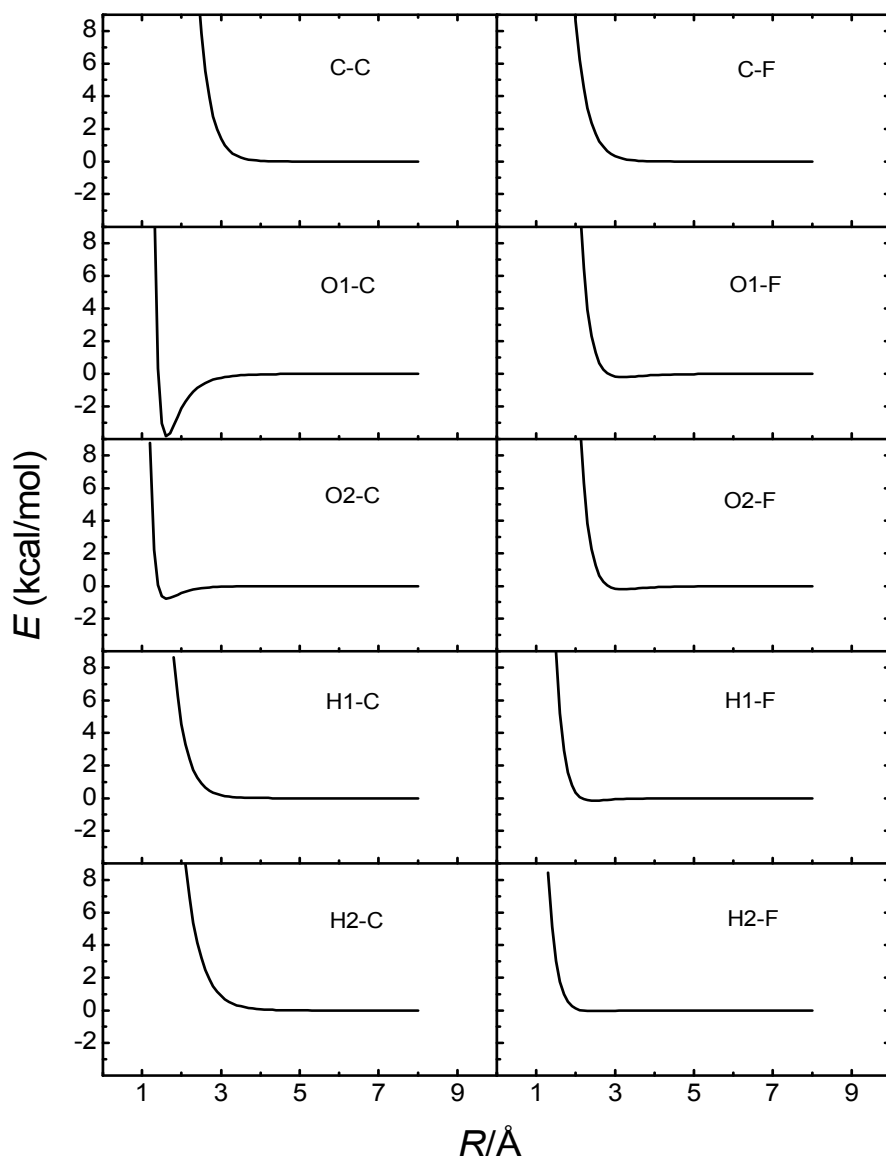

Figure S5. Two-body potentials obtained from the HCOOH/CF<sub>4</sub> fitting. O1 and O2 are carbonyl and hydroxyl oxygens, respectively. H1 and H2 are the carbonyl and hydroxyl hydrogens, respectively.

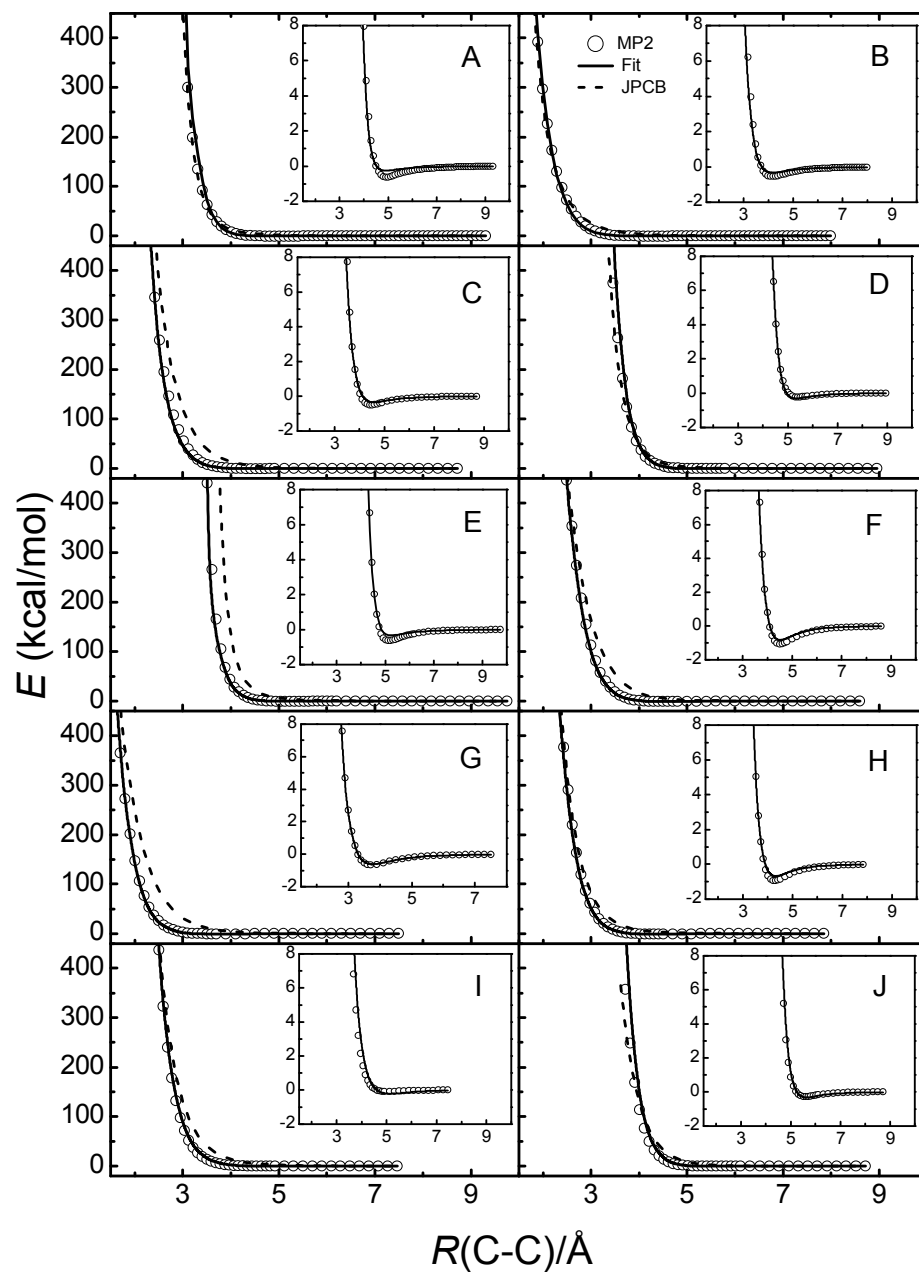

Figure S6. For the HCOOH/CF<sub>4</sub> system: a comparison between our present potential (solid lines) and that reported in JPC B 2005, 109, 8320 (dashed lines). The insets do not show the JPC-B data.

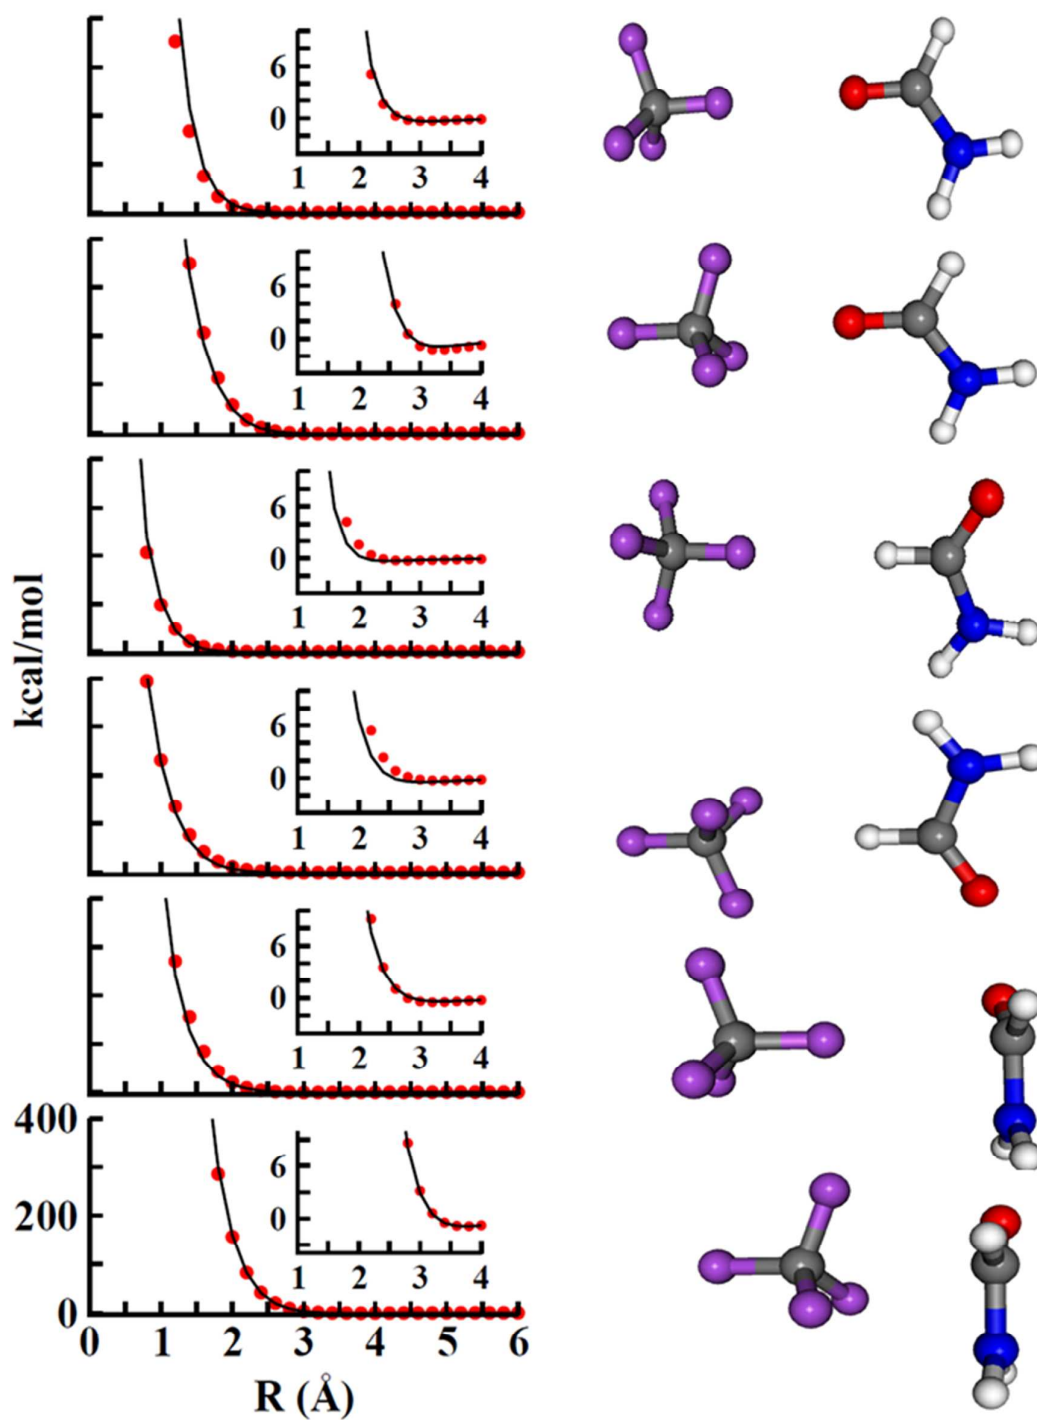

Figure S7: Comparison between IPECs calculated at the MP2/aug-cc-pVTZ level (solid circles) for  $\text{CF}_4$  interacting with  $\text{HCONH}_2$  and those predicted with the analytic potentials (solid lines) using parameters listed in Table 2.



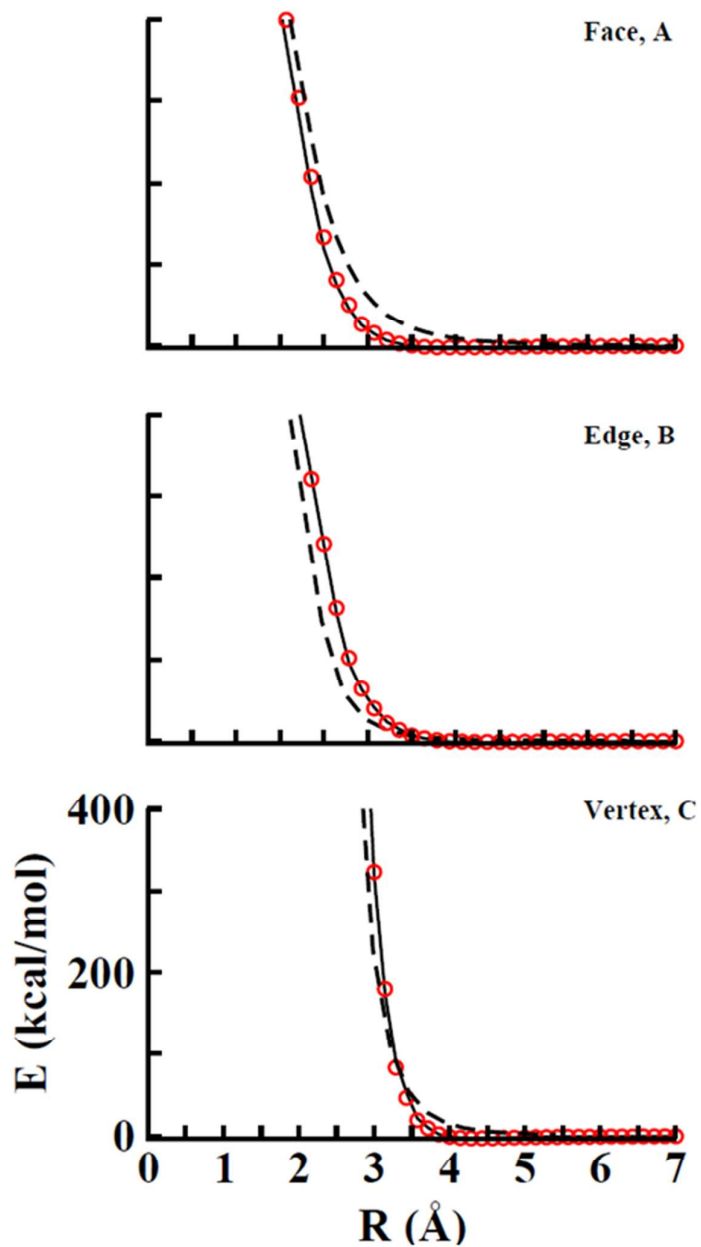

Figure S8: For the  $\text{NH}_4^+/\text{CF}_4$  system: a comparison between our present potential (solid lines) and that reported in ref. 97 (dashed lines), for the orientations considered in the latter. The points are the MP2 calculations. Both the current and previous identifications are given.

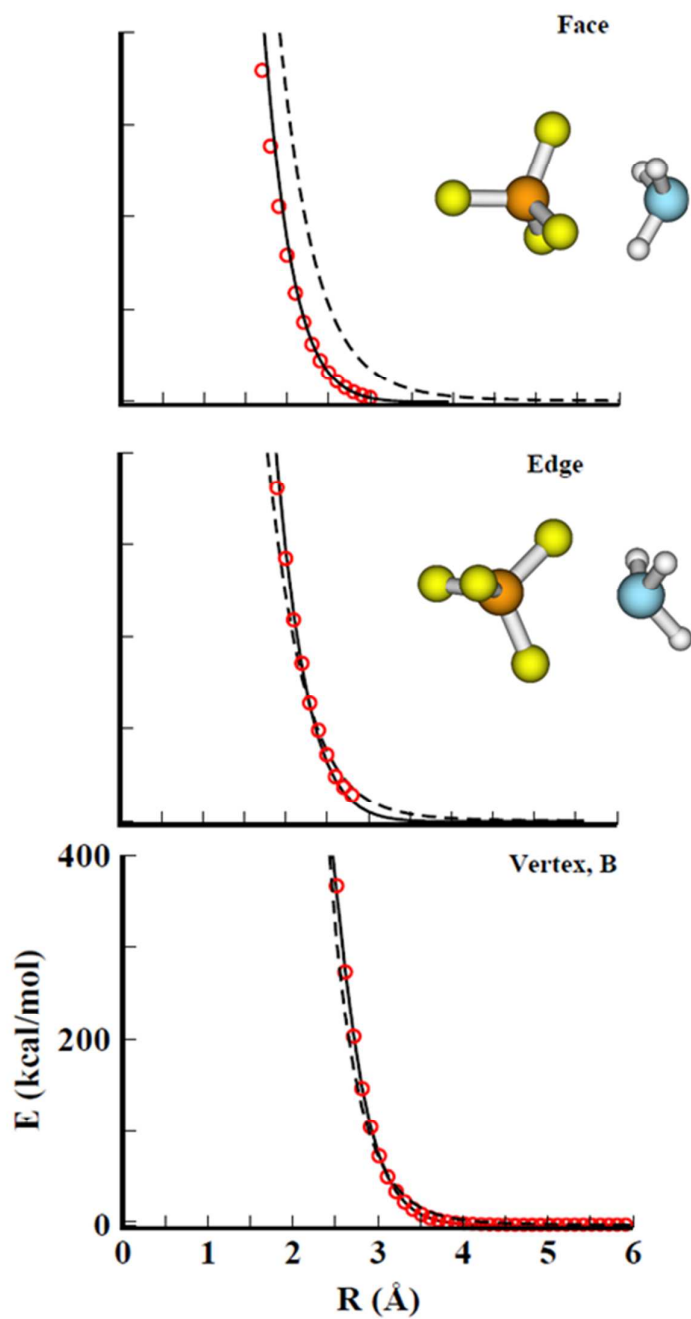

Figure S9: For the  $\text{NH}_3/\text{CF}_4$  system: a comparison between our present potential (solid line) and that reported in ref. 97 (dashed lines), for the orientations considered in the latter. The points are from MP2 calculations. Both the current and previous identifications of the orientations are given.

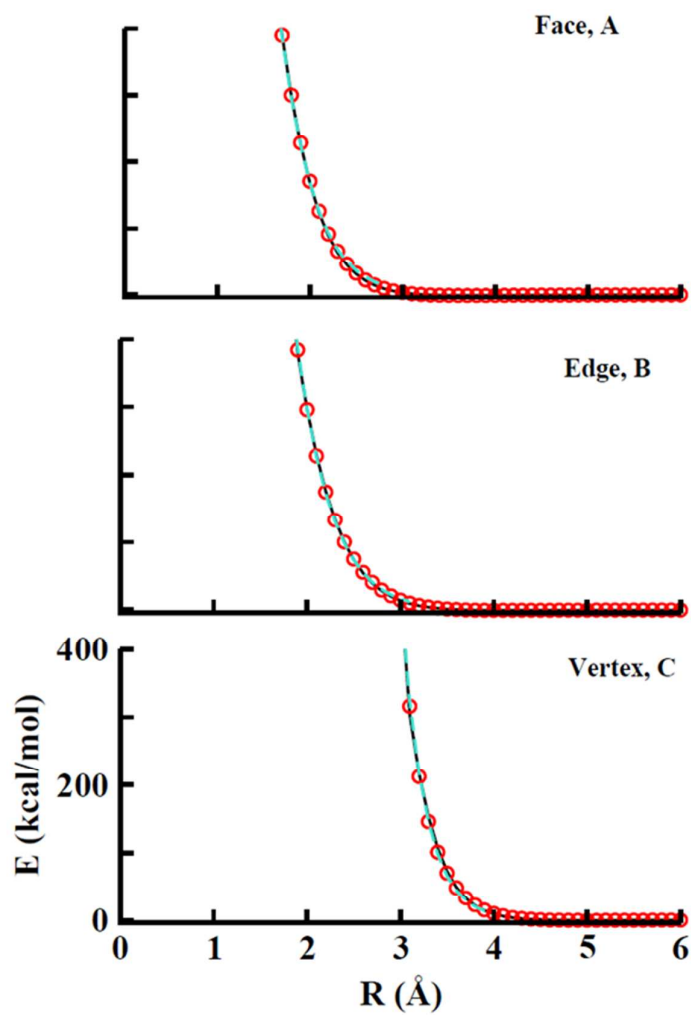

Figure S10: For the  $\text{CH}_4/\text{CF}_4$  system: a comparison between our present potential (solid lines) and that reported in ref. 97 (dashed lines), for the orientations considered in the latter. The points are from MP2 calculations. Both the current and previous identifications of the orientations are given.
